# Supplementary material for: Design of metalized polyether-ether-ether-ketone based on semi-additive manufacture for 5G applications: from bottom-up assembly to selective electroplating
Source: Royal Society of Chemistry journal article supplement (doi:10.1039/d4tc00997e), 2024-01-01
Supplement: d4tc00997e1.pdf [file d4tc00997e1.pdf]

## Supplementary Material

### Design of metalized polyether-ether-ketone based on semi-additive manufacture for 5G applications: From bottom-up assembly to selectively electroplating.

Qiuyan Duan<sup>1</sup>, Qi Sun<sup>1,\*</sup>, Yinxiang Lu<sup>1,2,3,\*</sup>.

<sup>1</sup> Department of Materials Science, Fudan University, Shanghai 200438, China

<sup>2</sup> Yiwu Research Institute of Fudan University, Yiwu City, Zhejiang 322000, China

<sup>3</sup> Zhongshan-Fudan Joint Innovation Center, Zhongshan City, Guangdong 528437, China

\*Corresponding Author E-mail: sqhit@fudan.edu.cn (Qi Sun); yxlu@fudan.edu.cn (Yinxiang Lu).

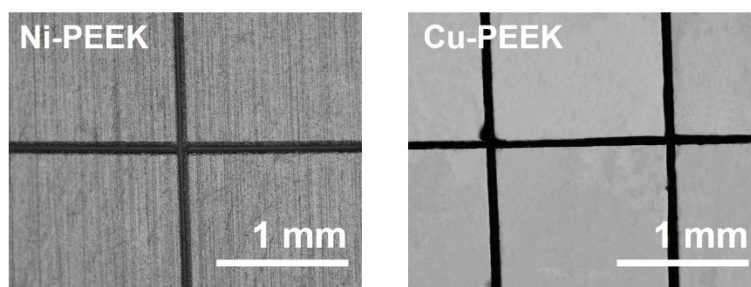

Figure S1. Optical photographs of PEEK-Ni and PEEK-Cu after 3M test.

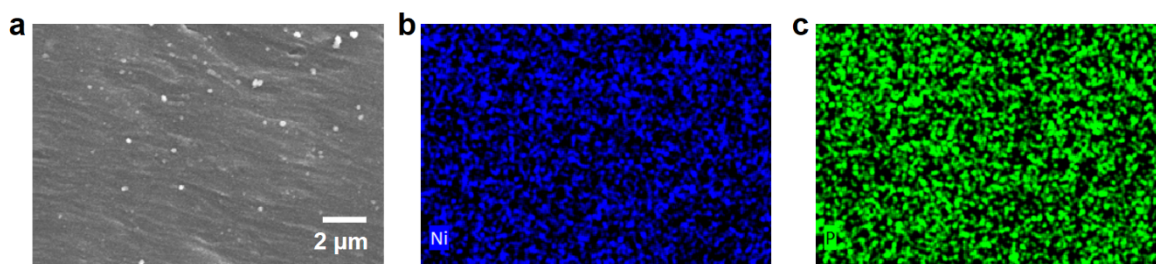

Figure S2. (a) SEM image of PEEK-Ni surface, SEM-EDX distribution of (b) nickel and (c) phosphorus.

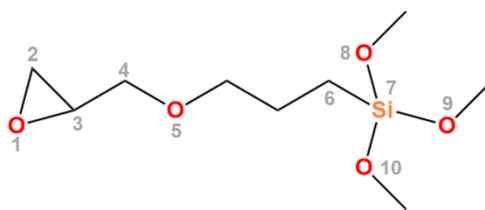

Figure S3. Molecular structure of GPTMS.

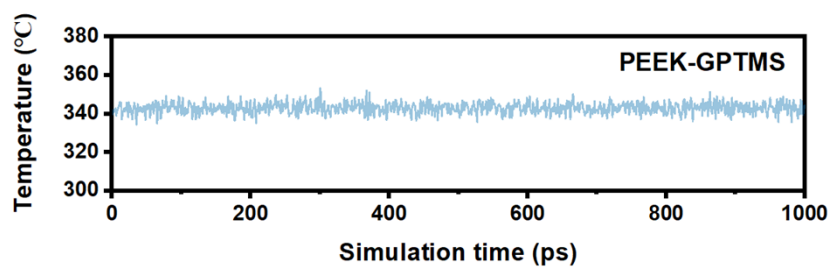

Figure S4. Temperature change along simulation time in MD simulation.

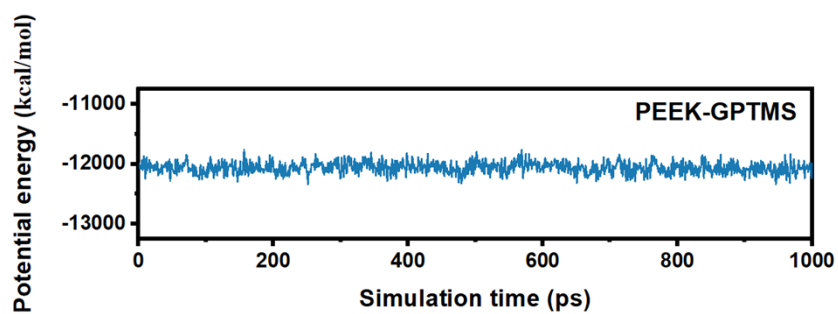

Figure S5. Potential energy change along simulation time in MD simulation.

Table S1. Composition of Ni plating bath solution

| Chemical reagent                          | concentration   |
|-------------------------------------------|-----------------|
| $\text{NiSO}_4 \cdot 6\text{H}_2\text{O}$ | 25 g/L          |
| $\text{NaH}_2\text{PO}_2$                 | 25 g/L          |
| $\text{Na}_4\text{P}_2\text{O}_7$         | 50 g/L          |
| stabilizer A                              | trace           |
| surfactant B                              | trace           |
| $\text{NH}_3 \cdot \text{H}_2\text{O}$    | adjust pH=10~11 |

Table S2. Fukui functions for GPTMS structure.

| Atom | $f^-$  | $f^+$  |
|------|--------|--------|
| O-1  | 0.090  | 0.005  |
| C-2  | 0.014  | 0.005  |
| C-3  | -0.005 | 0.008  |
| C-4  | -0.025 | 0.002  |
| O-5  | 0.255  | 0.000  |
| C-6  | -0.009 | -0.073 |
| Si-7 | 0.016  | 0.099  |
| O-8  | 0.017  | -0.035 |
| O-9  | 0.008  | -0.018 |
| O-10 | 0.013  | -0.048 |

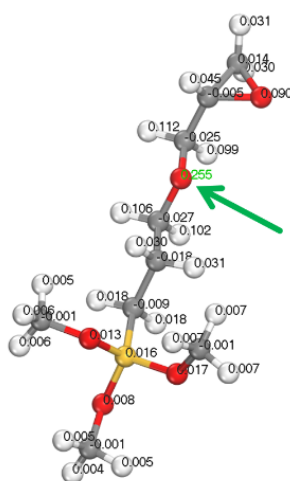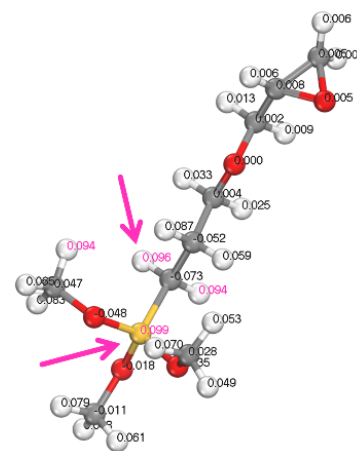

Note: In the illustration, the green arrow indicates the atom with the largest electrophilic attack index, and the red arrow indicates the atom with the largest nucleophilic attack index.
